# Supplementary material for: Air Pollution, housing and respiratory tract Infections in Children: NatIonal birth Cohort study (PICNIC): study protocol
Source: HighWire-hosted journal article supplement (doi:10.1136/bmjopen-2020-048038), 2021-05-01

**Database of identifiers in the birth cohort, held by ONS Health Analysis and Life Events Team (Step 1)**

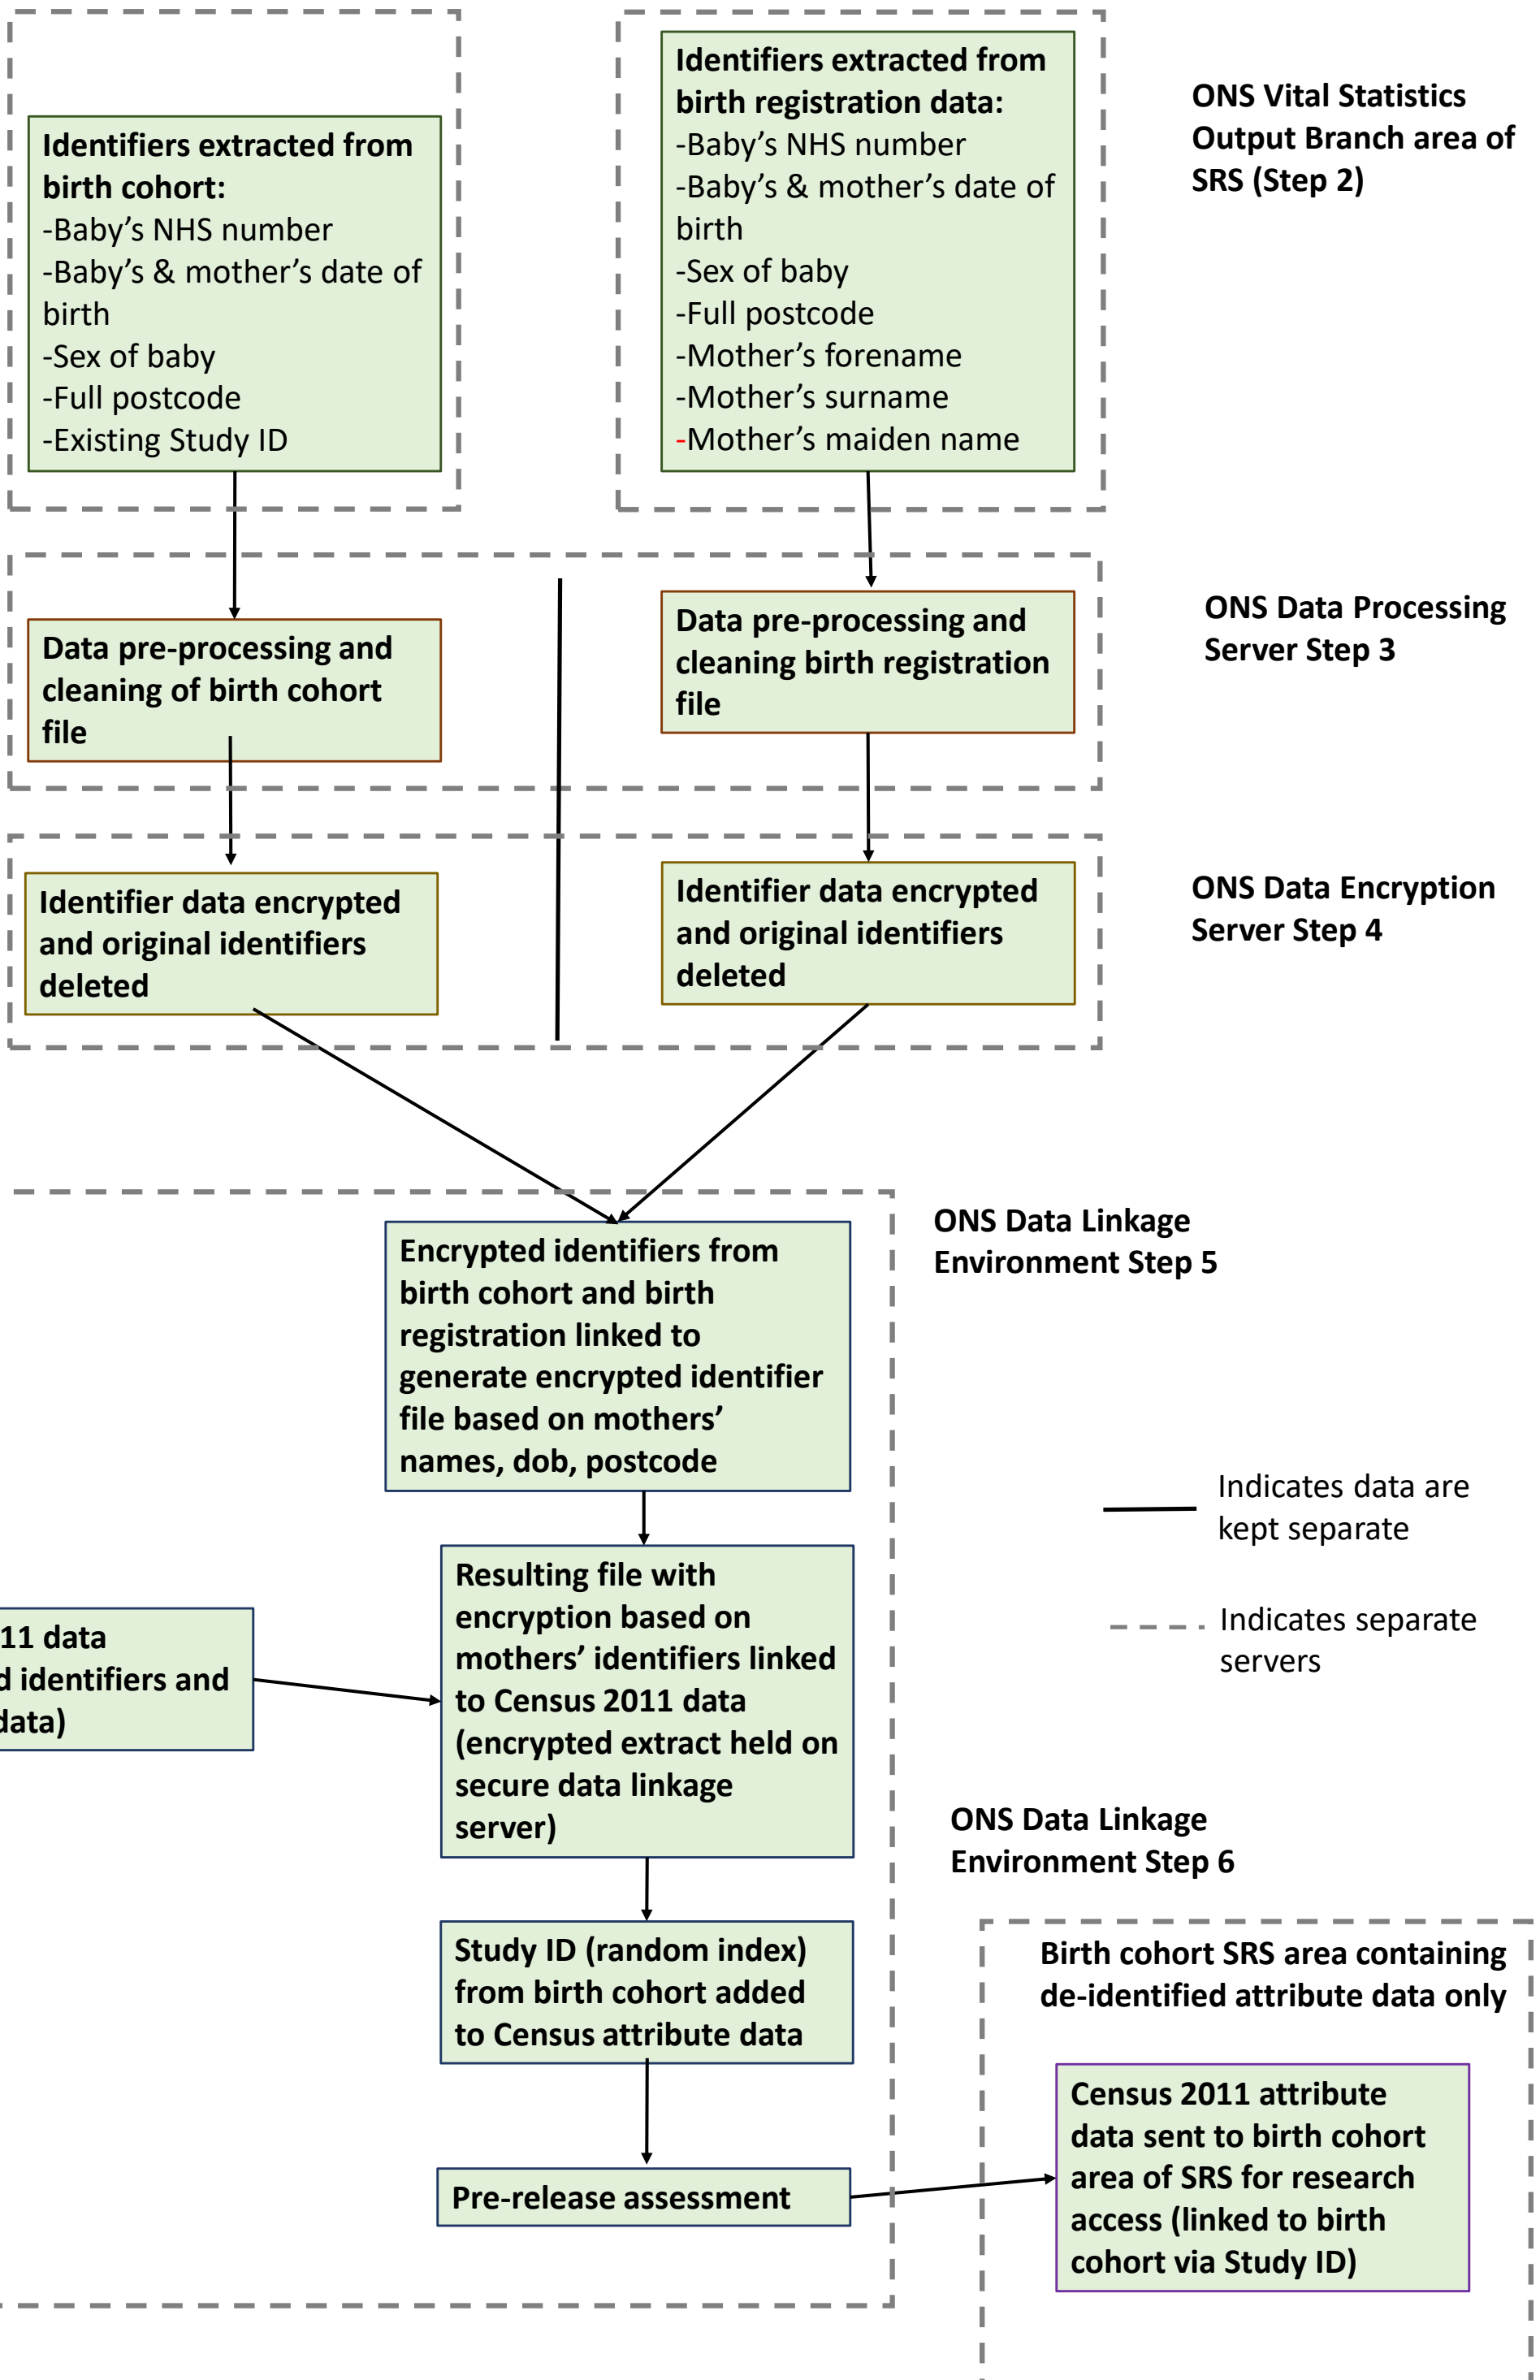

Supplement: bmjopen-2020-048038supp001_data_supplement.pdf [file bmjopen-2020-048038supp001_data_supplement.pdf]
